# Supplementary material for: Older birds have better feathers: A longitudinal study on the long-distance migratory Sand Martin, Riparia riparia
Source: PLoS One. 2019 Jan 4;14(1):e0209737. doi: 10.1371/journal.pone.0209737 (PMC6319700; doi:10.1371/journal.pone.0209737)
Supplement: S1 File — (XLS) [file pone.0209737.s009.xls]

## Sheet: data
RING	age_ind_b	age	sex	year_T5	bending_T5	width_T5	length_T5	mass_T5	weird_cat_T5	ALL1B	day	RINGER	wing_length	mass_g	tarsus	keel	tailm
L94241		3	M	1995	1.93718	0.77	58.7	6.58	1	2.4	95	0	106	13.6			53.5
L94241	4	4	M	1996	1.85007	0.75	58.44	6.8	0	2.25	89	K	106	13
F39788		7	M	1995	2.0437	0.83	59.24	7.13	0	2.31	93	8	108	12.6			55
F80551		2	F	1995	2.0081	0.79	57.32	6.81	0	2.68	96	H	109	13.5			55.5
F80551	7	7	F	2000	1.86775	0.78	58.69	6.74	1	2.35	39	L	108	15.8		17.69	56
M10181		3	M	1996	2.01835	0.8	58.02	7.07	0	2.65	89	0	110	15			52
M10181	6	6	M	1999	2.35073	0.81	58.1	7.39	1	2.41	61	0	109	16.7		19.27	52
M31311		2	F	1997	1.80374	0.81	56.76	6.75	1	2.51	96	S	108	15.4			60
M31311	3	3	F	1998	1.88135	0.79	58.83	6.85	1	2.74	88	0	109	16.7		18.89	55.5
H74514		3	M	1997	1.98459	0.78	58.95	6.63	0	2.38	93	K	112	13.6			54.5
H74514	5	5	M	1999	2.22019	0.79	58.16	6.6	0	2.43	62	0	111	14.2		18.17	53
M57739		2	M	1997	2.27977	0.81	59.58	7.23	0	2.6	95	0	109	12.7		18.22	55
M57739	4	4	M	1999	2.20453	0.79	58.67	7.03	0	2.31	62	0	108	14.2		18.03	52.5
M57824		2	F	1997	2.68332	0.82	62.04	7.63	1	2.4	95	0	111	13		18.9	57.5
M57824	4	4	F	1999	2.96334	0.84	59.66	7.36	1	2.82	100	0	109	14		18.95	56
H73392		3	M	1997	2.36156	0.81	60.23	6.99	1	2.26	90	0	109	15		19.15	55
H73392	5	5	M	1999	2.59544	0.82	59.91	7.27	1	2.32	93	0	111	11		19.55	56.5
M33905		2	F	1998	2.40992	0.81	57.95	7.28	1	2.31	91	0	105	13.7		18.58	52
M33905	3	3	F	1999	2.23401	0.8	57.92	7.25	1	2.4	88	0	105	14		18.58	52.5
T12776		3	F	2000	2.43456	0.81	59.75	6.93	1	2.52	92	0	111	13.7	10.5	19.11	56
T12776	4	4	F	2001	2.60068	0.85	60.18	7.66	0	2.35	48	L	110	15.6		19.35	56
M33356		2	F	1998	2.20807	0.77	58.45	6.75	1	2.48	77	D	107	11.8			55
M33356	3	3	F	1999	2.28774	0.79	59.67	6.78	1	2.35	86	Z	107	12			55.5
L76608	6	6	F	1998	1.74063	0.81	57.34	6.77	0	2.43	88	K	107	14.1			55
T11607		2	M	1999	2.55266	0.88	59.15	7.16	0	2.68	86	0	110	12.4		18.78	53
T11607	5	5	M	2002	2.83205	0.86	59.27	7.35	0	2	63	L	112	14.3		18.78	55
L94183	7	7	F	1999	2.65062	0.83	59.61	7.8	1	2.37	93	P	109	13.1		19	56
T25334		2	M	1999	2.30682	0.83	57.68	6.88	0	2.13	93	0	108	13.5		18.56	53
T25334	3	3	M	2000	1.87537	0.82	56.45	6.5	0	2.3	96	L	109	13.2	10.1	18.51	56
H70297	5	5	M	1999	2.13912	0.79	60.63	7.45	0	2.38	88	Z	114	13.2			57.5
H71642	5	5	F	1999	2.29691	0.82	57.29	6.79	1	2.31	88	S	110	15			55
L95383	5	5	F	1997	2.13724	0.82	60.85	7.12	0	2.47	91	K	113	15.5			56
H71734		3	M	1997	1.87412	0.84	56.73	6.55	1	2.83	91	0	107	12.7		18.81	53.5
H71734	6	6	M	2000	1.57096	0.79	55.36	6.32	1	2.31	94	0	107	13.8	11	18.77	49.5
T11467		2	F	1999	2.12119	0.85	56.68	6.34	0	2.13	88	0	108	13.4		18.91	52
T11467	5	5	F	2002	1.73848	0.83	58.09	6.58	0	2.55	44	L	109	13.5		18.99	56
H70062	5	5	M	1999	2.7965	0.84	62.68	7.52	0	2.49	92	0	111	14.2		18.98	57
F81905	7	7	M	2000	1.98592	0.84	59	6.76	1	2.69	90	L	104	14.6	10.9	18.57	55
4E0475		1	F	2000	2.34931	0.84	58.94	6.94	1	2.19	89	L	107	13.8	10	18.64	55.5
4E0475	7	7	F	2006	2.77067	0.87	59.73	7.39	1	2.46	89	Z	110	14.4	10.04	18.52	57
T94690		1	M	2000	2.2885	0.81	60.77	6.86	0	2.3	89	L	110	13.2	10.5	18.74	58
T94690	2	2	M	2001	2.01526	0.81	59.89	6.46	1	2.47	95	0	111	14		18.7	55
T92584		2	M	2000	1.59571	0.8	53.44	5.67	1	2.73	73	L	107	13.6		18.43	55
T92584	4	4	M	2002	1.70692	0.8	54.76	6.03	1	2.51	54	L	109	13.1		18.51	50
T95541		1	M	2000	1.74325	0.8	55.25	6.43	1	2.6	74	L	106	12.8		18.75	50
T95541	3	3	M	2002	2.08109	0.79	57.14	6.39	1	2.37	52	L	110	12.3		19.07	53
H74875	6	6	M	2000	2.32986	0.86	56.67	6.7	1	2.06	90	L	105	14.1	9.8	18.39	52
4E1786	1	1	M	2001	2.01529	0.78	58.85	6.64	0	2.12	58	L	110	15.5		19.09	57
4E1786		2	M	2002	2.1013	0.76	58.99	6.78	0	2.2	44	L	113	13.4		19.21	55
T94961		1	F	2000	2.01668	0.85	56.88	6.42	1	2.15	73	L	107	15.5		18.07	54.5
T94961	2	2	F	2001	1.81067	0.84	58.72	6.86	0	2.45	60	L	107	14.9		17.92	54.5
M57542	5	5	M	2000	2.45548	0.8	59.89	7.65	1	2.53	67	L	112	15		19.62	56
T95827	1	1	F	2000	2.28099	0.83	53.88	6.41	1	2.33	91	0	106	12.7	11		49.5
T95827		2	F	2001	2.21924	0.84	54.86	6.33	1	2.06	101	L	106	14.3		18.62	53.5
4E1514		2	M	2002	1.78592	0.76	58.91	6.29	0	1.9	52	L	115	14		18.29	56
4E1514	3	3	M	2003	1.64666	0.75	56.6	6.17	0	2.28	108	0	112	14.3	11.2	18.5	55.5
T94579		1	F	2000	2.4793	0.84	61.72	7.35	0	2.45	88	L	112	13.1	10.4	18.77	60
T94579	3	3	F	2002	2.71301	0.85	64.16	7.57	1	2.66	67	L	115	14.8		18.81	60
H70832		6	F	2000	2.81288	0.86	61.82	7.75	0	2.71	53	L	110	15.5		18.74	57
H70832	7	7	F	2001	2.80359	0.84	59.17	7.19	1	2.38	97	0	109	14.6		18.23	54
T94630	1	1	M	2000	1.28705	0.76	53.02	5.31	1	2.48	98	Z	103	11.6	10	18.45	51.5
T94630		2	M	2001	1.35165	0.75	55.53	5.72	0	2.12	53	0	104	13.4		18.61	56.5
T65939		2	F	2000	2.57496	0.84	58.38	6.95	1	2.73	93	0	110	15.3	11.5	20.36	51.5
T65939	3	3	F	2001	2.44186	0.83	58.53	7.06	1	2.71	84	L	110	14.5		19.14	57
3E1829	1	1	F	2000	1.9011	0.83	56.94	6.3	0	2.21	94	0	108	14	10.8	20.73	52
3E1829		2	F	2001	2.22734	0.83	58.38	6.63	0	2.17	51	L	108	16.7		19.06	54.5
T142161	1	1	F	2001	1.63192	0.76	57.7	6.62	0	2.54	95	Z	107	13.1		18.73
T142161		2	F	2002	1.52928	0.78	59.29	7	0	2.46	65	L	107	13.9		18.97	55
T144723		1	F	2001	2.21633	0.79	56.52	6.22	1	2.6	97	0	105	14		18.95	52.5
T144723	2	2	F	2002	2.16131	0.74	57.52	6.43	0	2.47	96	0	106	13.8		19.27	51.5
T92866		2	M	2001	1.84086	0.82	56.24	6.38	1	2.35	53	0	108	14		18.45	53
T92866	3	3	M	2002	1.86882	0.76	54.79	5.8	1	2.42	54	L	112	13.6		18	56
4E1086		2	M	2001	1.88829	0.79	55.51	5.89	1	2.63	55	L	105	14.2		17.68	52
4E1086	3	3	M	2002	1.42277	0.78	53.69	5.82	0	2.23	56	L	108	14.3		17.95	51
T144108		1	M	2001	1.66543	0.78	55.37	6.3	0	2.34	67	L	106	11.4		19.03	53
T144108	2	2	M	2002	1.94187	0.76	56.82	6.57	0	2.66	56	L	107	13.4		19.03	55
T95021		2	M	2001	2.10715	0.8	56.04	6.56	0	2.26	58	L	106	13.6		19.17	55
T95021	3	3	M	2002	1.53847	0.74	52.84	5.58	1	2.31	97	L	108	12.8		18.96	54.5
4E2869		2	M	2002	2.47313	0.83	58.21	6.83	0	2.68	47	L	111	13.9		18.57	57
4E2869	6	6	M	2006	2.69115	0.84	59.08	7.19	0	2.52	49	Z	112	13.7	10.73	18.07	58
T93928		2	F	2001	1.99503	0.79	55.58	6.51	1	2.34	94	0	103	15.4		19.41	51
T93928	3	3	F	2002	2.2932	0.81	57.75	7.13	0	2.61	48	L	107	16		19.74	55
T141183		1	M	2001	1.83691	0.79	57.3	6.25	0	2.43	90	Z	111	14.2		18.37	53
T141183	2	2	M	2002	2.3043	0.84	60.99	7.3	0	2.46	54	L	111	13.8		18.43	56
4E1757		1	M	2001	1.9895	0.8	58.84	6.7	1	2.11	76	L	111	13.6		19.45	56
4E1757	7	7	M	2007	2.38601	0.82	60.36	7.26	1	2.88	87	0	115	14.3	10.29	19.82	57
T140126	1	1	F	2001	2.17195	0.8	56.79	6.36	1	2.58	91	L	109	15.4		18.9
T140126		2	F	2002	2.07212	0.82	57.77	6.66	1	2.57	52	L	109	15.1		18.79	58
H74510	7	7	M	2001	2.49224	0.84	60.96	7	1	2.55	95	L	116	12.8		17.91	58
T217941		2	F	2003	2.33612	0.8	59.98	7.14	0	2.53	64	L	108	13.5		18.37	57
T217941	3	3	F	2004	2.42146	0.79	61.05	7.44	0	2.55	53	0	107	13.5	10.33	18.81	56
4E2587		1	M	2001	1.423	0.79	55.86	5.63	1	2.19	50	L	105	13.1		17.86	52
4E2587	2	2	M	2002	2.01723	0.82	57.79	6.09	0	2.35	48	L	107	15.3		18.48	54
T146088	1	1	F	2001	2.011	0.79	56.45	6.53	0	2.31	50	L	106	13.4		18.56	55.5
T146088		2	F	2002	2.10854	0.81	57.7	6.59	0	2.28	52	L	107	13.6		18.57	55
T142335		1	F	2001	1.80896	0.78	57.36	6.56	0	2.42	85	L	106	13.5		18.75	54.5
T142335	2	2	F	2002	1.82199	0.8	57.92	6.9	0	2.46	73	L	108	12.5		18.72	55
4E1764		1	M	2001	2.04995	0.77	57.04	6.24	0	2.3	69	L	108	13.6		19.12	56
4E1764	2	2	M	2002	2.17242	0.77	58.86	6.48	1	2.4	92	L	111	13.3		19.15	56
T144283		1	F	2001	1.93249	0.79	59.61	6.76	0	2.41	92	L	111	13.1		18.03
T144283	2	2	F	2002	2.15913	0.79	59.63	6.96	0	2.46	50	L	110	13.7		17.97	53
4E2573		1	M	2001	1.82375	0.84	56.85	6.08	1	2.59	92	L	110	13.1		19.08	56
4E2573	2	2	M	2002	2.47531	0.84	60.37	7.19	0	2.66	58	L	112	14.1		19.23	56.5
T147020		1	F	2001	2.16178	0.78	61.09	6.79	0	2.37	90	0	110	14		18.45	58
T147020	2	2	F	2002	2.4037	0.78	62.58	7.28	0	2.43	88	L	115	12.6		18.25	60
4E1051		2	M	2001	2.77953	0.88	61.15	7.68	0	2.51	55	Z	113	15.3		19.68	56
4E1051	3	3	M	2002	1.8805	0.87	60.07	7.47	1	2.56	59	L	113	15		18.45	56.5
T144156	1	1	F	2001	2.68951	0.79	56.34	6.36	0	2.11	98	L	108	13.2		18.41	55.5
T144156		2	F	2002	1.82669	0.79	58.5	6.37	0	2.28	56	L	109	14.7		18.54	55
T142068		1	M	2001	1.60883	0.78	56.02	6.39	1	2.26	92	L	107	13		17.67	53.5
T142068	2	2	M	2002	2.17833	0.79	58.98	7.09	0	2.61	46	L	110	13.4		17.93	57
H73504	7	7	M	2001	2.30624	0.83	58.58	6.95	1	2.86	85	L	109	13.2		18.99	56
T143080		2	M	2002	2.37497	0.82	59.28	7.11	0	2.55	94	0	109	13.5		19.59	54.5
T143080	3	3	M	2003	1.87757	0.76	57.72	6.31	0	2.08	64	L	114	12.8		17.67	55
T140057		2	F	2002	2.10499	0.82	59.72	7.34	1	2.69	91	L	110	13.2		18.36	58
T140057	3	3	F	2003	2.36899	0.79	59.33	7.51	0	2.66	82	0	107	13.4	10.2	18.89	56
T220678		1	M	2002	1.943	0.79	60.61	6.29	1	2.45	97	0	111	13.1		19.32	54.5
T220678	2	2	M	2003	2.06821	0.81	61.59	6.59	1	2.1	87	0	112	12.3	10.1	19.77	58
T25364	5	5	M	2002	2.25453	0.86	60.47	7.17	0	2.56	96	0	107	13.8		19.35	57
T147450		1	M	2002	1.74061	0.76	54.32	5.62	1	2.37	88	L	107	12.1		18.41	53
T147450	3	3	M	2004	1.70306	0.76	55.27	5.71	0	2.08	59	0	106	12.6	10.38	19.17	51.5
T216087	1	1	M	2002	1.44792	0.78	59.59	6.37	0	2.79	74	L	112	14.7		18.58	57.5
T216087		2	M	2003	1.62093	0.71	57.68	6.12	1	2.2	56	L	113	15.3		18.58	59
T216864		1	F	2002	1.81242	0.78	56.46	5.95	1	2.75	89	L	110	12.6		18.84	51
T216864	2	2	F	2003	1.83986	0.79	58.17	6.23	0	2.24	56	Z	109	15		19.18	53
T217995	1	1	M	2002	1.56684	0.81	57.2	6.17	0	2.28	73	L	109	15.5		18.8	55
T217995		2	M	2003	1.93731	0.83	59.94	7.03	0	2.71	39	Z	111	15.1	10.8	18.67	57.5
T13000		5	F	2002	2.05461	0.86	59.51	6.83	1	2.5	73	L	112	12.8		18.4	57
T13000	6	6	F	2003	2.2802	0.82	58.51	6.75	1	2.53	87	Z	111	13.7	10.8	18.84	54
T142487		2	M	2002	1.67697	0.86	57.32	6.7	1	2.58	90	0	107	13.8		19.31	51.5
T142487	3	3	M	2003	2.00891	0.85	57.85	7.07	0	2.31	85	0	108	14	10.5	19.32	53.5
T215884		1	M	2002	1.96714	0.82	56.63	6.51	0	2.99	93	L	104	12.7		18.16	54
T215884	4	4	M	2005	1.94792	0.79	54.25	6.11	1	2.18	96	0	107	13.2	9.62	18.85	52
T216142		1	M	2002	1.55888	0.77	58.01	6.06	0	2.29	93	L	109	12.5		18.42	53
T216142	2	2	M	2003	1.62958	0.76	59.23	6.65	0	2.45	84	0	109	12.1	10.5	18.73	54
T216073		1	M	2002	1.6742	0.77	57.57	6.22	0	2.52	67	L	110	14.5		18.78	54
T216073	2	2	M	2003	1.6601	0.77	59.18	6.25	1	2.46	50	L	111	13.8	10.3	18.89	55
T93778		3	M	2002	2.56402	0.79	62.92	7.9	1	2.68	54	L	115	15.6		19.6	58
T93778	5	5	M	2004	2.45859	0.8	62.04	7.94	1	2.34	84	0	110	15.1	10.74	20.42	55
T297320		1	F	2003	1.73121	0.8	57.5	6.41	0	2.34	64	L	109	14.3		18.44	55
T297320	2	2	F	2004	2.24006	0.81	59.37	6.54	0	2.22	55	0	109	15.4	10.22	18.84	56
T297071	1	1	M	2003	1.53103	0.79	57.27	6.42	0	2.36	64	L	109	14.7		18.73	54
T297071		2	M	2004	1.98327	0.8	58.86	6.6	1	2.48	83	0	108	13.6	10.81	19.83	55
T296704		1	M	2003	2.2073	0.83	57.9	6.57	0	2.46	58	L	110	13.4		17.07	54.5
T296704	2	2	M	2004	2.10794	0.82	57.18	6.55	0	2.04	61	Z	109	13	9.94	16.76	54
T218908	1	1	M	2003	1.50659	0.78	53.42	5.41	1	2.64	89	0	104	12	10.2	19.08	49
T218908		2	M	2004	1.11248	0.75	53.83	5.76	1	2.27	55	0	105	12.7	10.24	19.37	49
T218800		1	F	2003	2.25879	0.86	57.25	6.87	1	2.64	88	Z	105	13.5	10.2	18.74	53
T218800	2	2	F	2004	2.03209	0.84	58.24	7.4	0	2.5	90	Z	108	12.7	10.13	18.72	55
T296002		1	F	2003	2.26457	0.84	55.32	6.48	1	2.56	84	Z	103	14.6	10.1	17.86	51
T296002	3	3	F	2005	1.9413	0.82	55.77	6.32	1	2.51	84	0	103	14.5	10.06	18.42	51
T297557	1	1	F	2003	1.72766	0.8	56.22	5.76	1	2.54	85	Z	106	13.9	11.2	18.57	53
T297557		2	F	2004	1.97162	0.78	59.08	6.22	1	2.41	85	0	107	13.5	11.4	18.98	53.5
T141857		3	M	2003	2.64601	0.82	61.21	7.67	0	2.55	87	Z	110	14.8	10.7	17.92	58
T141857	4	4	M	2004	2.66997	0.83	61.56	7.5	0	2.47	85	0	110	14.6	10.66	18.57	55.5
T297633		1	M	2003	2.10139	0.8	57.64	6.83	0	2.18	81	0	106	13.8	10.5	19.5	53
T297633	4	4	M	2006	2.07591	0.8	57.22	7.03	1	2.23	111	0	105	13.8	9.97	19.48	52
T296437		1	F	2003	2.31496	0.85	59.14	6.58	0	2.67	85	0	106	12.5	11	18.2	54.5
T296437	6	6	F	2008	2.57709	0.85	61.73	7.05	0	2.78	24	0	108	14.1	10.75	18.35	56.5
T296280		1	M	2003	2.39755	0.8	59.48	6.75	0	2.41	83	0	106	13.2	10.3	18.46	55
T296280	2	2	M	2004	2.26843	0.84	60.13	6.88	0	2.18	56	0	107	14	10.37	18.41	55
T296998		1	F	2003	2.30028	0.82	60.33	7.33	1	2.7	83	0	109	13.2	10.1	18.26	55
T296998	2	2	F	2004	2.36884	0.82	61.82	7.01	0	2.6	56	0	109	13.8	10.06	18.75	57
T147432		2	M	2003	1.5296	0.71	53.73	5.74	1	2.35	83	0	106	12.7	10.7	19.32	49.5
T147432	4	4	M	2005	1.29689	0.72	55.93	5.92	1	2.31	94	0	105	12.9	10.6	19.39	53
T297084		1	F	2003	1.46023	0.78	56.22	6.24	1	2.32	86	0	103	15.2	11.3	19.25	50
T297084	2	2	F	2004	1.61072	0.79	57.65	6.68	0	2.41	84	Z	106	15.2	10.58	18.72	53
T220086		2	F	2003	1.96162	0.8	61.48	7.35	0	2.36	81	0	108	14	10.6	18.43	57
T220086	3	3	F	2004	2.24994	0.79	62.29	7.61	1	2.2	99	Z	112	14.5		18.02	59
T296357	1	1	M	2003	1.67886	0.79	60.41	6.51	0	2.41	64	0	109	12.9	10.4	18.87	56.5
T296357		2	M	2004	1.86342	0.78	62.37	6.83	0	2.49	56	0	111	14	10.35	19.67	60
T218374		1	M	2003	1.9064	0.81	56.93	6.43	1	2.53	85	0	110	13.3	10.3	19.76	52.5
T218374	2	2	M	2004	2.12711	0.81	58.76	6.96	0	2.59	63	Z	112	14.5	9.89	18.35	55.5
T220056		2	M	2003	1.72421	0.8	58.11	6.21	1	2.82	84	0	106	11.7	10.3	17.88	52
T220056	3	3	M	2004	1.82111	0.8	59.64	6.52	1	2.83	100	0	105	12.7	10.19	17.84	52
T296722		2	M	2004	2.64372	0.83	58.71	7.01	1	2.88	80	Z	111	14.2	10.53	19.01	53.5
T296722	3	3	M	2005	2.96157	0.83	59.71	7.48	0	2.3	33	0	110	14.7	10.73	19.67	54
T297362		2	M	2004	2.25029	0.82	58.93	6.44	1	2.43	59	0	109	12.7	10.13	18.7	54
T297362	4	4	M	2006	1.85698	0.84	57.99	6.62	1	2.49	111	0	108	12.3	10.25	18.71	53
T375805		1	F	2004	2.31602	0.84	58.56	7.08	0	2.84	59	0	109	13.9	11.09	18.6	54.5
T375805	4	4	F	2007	2.4224	0.84	59.36	7.24	0	2.39	65	Z	110	15	10.74	17.86	58
T302865		1	M	2004	2.20465	0.86	60.58	7.34	0	2.85	56	0	113	13.4	10.96	19.14	56
T302865	2	2	M	2005	2.25552	0.82	59.59	7.28	0	2.44	67	Z	116	14.2	10.86	19.11	59
T304069		1	F	2004	1.85548	0.78	57.71	6.69	0	2.54	84	0	109	14.6	10.79	17.49	56.5
T304069	5	5	F	2008	2.02476	0.8	59.75	7.37	1	2.33	86	Z	110	14.4	10.63	17.79	58.5
3E1652	5	5	M	2004	2.64742	0.8	60.69	7.15	1	2.56	84	Z	110	13.1	10.56	18.13	57
4E2648		4	M	2004	2.40533	0.82	60.28	7.19	0	2.68	86	Z	109	13.4	10.37	18.73	59
4E2648	5	5	M	2005	2.28532	0.81	60.23	7.37	0	2.37	93	0	108	14.2	10.46	19.26	56
T218606		3	M	2004	2.82042	0.89	61.47	7.56	1	2.75	61	Z	115	14.9	10.69	20.27	58
T218606	5	5	M	2006	2.98478	0.86	61.96	7.88	1	2.44	55	Z	116	14.6	10.87	20.39	60.5
T303384		1	M	2004	1.86629	0.77	56.27	6.14	1	2.61	63	Z	109	13.2	10.39	19	51.5
T303384	3	3	M	2006	1.92497	0.77	55.82	6.2	1	2.35	110	Z	110	13	10.49	18.11	53
T299839		2	F	2004	1.98261	0.81	58.65	6.88	1	2.67	84	Z	111		10.24	18.88	56
T299839	4	4	F	2006	2.02426	0.81	59.4	6.58	1	2.66	76	Z	110	15.8	10.55	18.91	58
T296772		2	M	2004	2.22684	0.82	58.03	6.61	1	2.38	79	Z	106	13.1	10.24	19.95	53.5
T296772	4	4	M	2006	2.16682	0.84	58.2	6.94	0	2.62	77	Z	108	12.9	10.49	18.88	56
T304114		1	F	2004	2.37599	0.8	58.95	6.91	1	2.58	70	0	108	14.3	10.86	19.01	54.5
T304114	3	3	F	2006	2.21071	0.82	59.65	7.11	1	2.55	89	Z	110	15.2	10.54	18.45	59.5
T303955		1	M	2004	1.71634	0.77	58.39	6.03	1	2.64	79	Z	111	14.2	10.56	19.51	53.5
T303955	4	4	M	2007	1.80709	0.77	60.09	6.3	1	2.57	73	Z	114	13.5	10.46	18.97	57
T302988		1	M	2004	1.54783	0.78	56.66	5.88	0	2.28	56	0	108	11.9	10.45	18.89	52
T302988	3	3	M	2006	1.63581	0.79	57.69	6.01	1	2.58	90	0	109	12.7	10.17	18.28	54
T140385	5	5	M	2005	2.10567	0.86	60.24	7.29	1	2.5	93	0	110	13.2	10.86	19.48	54
T95646	6	6	F	2005	1.94386	0.78	58.85	6.74	1	2.31	96	0	112	14.6	10.75	19.23	52.5
T302512		2	M	2005	2.17931	0.83	55.76	6.31	0	2.4	98	0	106	12.5	10.47	19.39	53
T302512	3	3	M	2006	2.21642	0.83	56.82	6.55	0	2.44	109	Z	107	12.3	10.44	18.39	53.5
T304825	3	3	M	2006	2.17964	0.79	60.33	6.84	1	2.3	67	Z	110	14.3	10.81	19.52	58
T304276		2	M	2005	2.28104	0.86	58.23	6.99	0	2.34	100	0	109	13.6	10.38	20.58	52
T304276	5	5	M	2008	2.73579	0.87	60	7.13	1	2.53	81	0	110	13.7	10.81	19.56	55
T148177	5	5	F	2005	2.00981	0.83	57.73	6.63	1	2.23	99	Z	107	12.2	10.45	18.46	57
T304826		2	M	2005	2.182	0.81	53.98	6.43	1	2.2	99	Z	105	12.2	10.5	18.2	56
T304826	4	4	M	2007	2.25245	0.85	58.16	7.01	1	2.23	91	0	105	12.5	10.32	18.34	52
T303216		2	F	2005	1.95236	0.81	57.25	6.11	1	2.01	100	Z	108	12.8	9.82	19.23	55
T303216	4	4	F	2007	1.97399	0.81	58.55	6.58	1	2.09	96	Z	111	11.6	9.8	18.21	57.5
T379925		1	M	2005	2.16738	0.82	54.9	6.29	1	2.14	93	0	107	13.5	10.06	19.08	52.5
T379925	5	5	M	2009	2.36487	0.82	59.07	7.35	1	2.19	65	0	109	13.7	10.5	18.89	55
T303676		3	F	2006	1.93933	0.79	59.86	6.67	1	2.32	48	Z	114	15.7	10.46	18.58	58.5
T303676	5	5	F	2008	2.16168	0.8	61.32	7.32	0	2.37	54	0	113	14.5	10.8	19.39	56
T303710		3	F	2006	2.41772	0.83	59.46	7.32	1	2.45	57	Z	112	15.1	10.34	19.34	57
T303710	5	5	F	2008	2.63056	0.84	59.16	7.2	0	1.91	24	0	110	14.1	10.59	19.65	54.5
T435050	1	1	F	2006	2.46348	0.85	62.65	7.66	0	2.56	67	Z	115	13.6	10.96	18.93	60
T435050		2	F	2007	2.4579	0.85	63.81	7.57	0	2.51	86	0	112	15	11.12	19.42	59
T431993		1	M	2006	2.16273	0.8	57.1	6.5	1	2.52	68	Z	108	13.7	10.88	20.03	56
T431993	3	3	M	2008	2.50442	0.84	58.71	6.73	1	2.57	62	0	107	13.4	10.46	19	56
T433650		1	M	2006	1.67925	0.74	56.45	5.66	1	2.38	88	0	106	13.5	10.44	19.28	52
T433650	3	3	M	2008	1.86316	0.78	58.67	6.1	0	2.53	62	0	108	13.1	9.91	19.55	54
T435268		1	M	2006	1.75524	0.78	52.67	5.48	1	2.15	89	0	103	13.2	10.53	20.04	50.5
T435268	2	2	M	2007	1.98914	0.79	58.2	6.75	1	2.6	89	0	106	11.7	10.45	20.07	53
T215941	5	5	M	2006	2.6906	0.79	60.2	6.76	1	2.71	93	0	113	14.7	10.56	19.11	56
T431968		1	M	2006	1.61111	0.82	55.34	6.32	1	2.5	74	Z	107	12.9	10.89	18.99	53
T431968	4	4	M	2009	2.11516	0.81	56.27	6.5	1	2.29	90	0	106	13	11.54	19.17	51
T375816		3	F	2006	2.30866	0.84	57.73	6.67	0	2.38	75	Z	112	14.6	10.46	19.52	56.5
T375816	5	5	F	2008	2.33738	0.83	57.43	6.66	1	2.34	87	0	111	15.4	10.91	20.11	53
T431881		1	F	2006	1.77227	0.77	56.31	6.37	1	1.95	76	Z	106	15.6	9.73	17.59	56
T431881	2	2	F	2007	1.94217	0.75	56.69	6.52	0	2.3	85	Z	107	13.4	10.05	16.94	56.5
T433217		1	F	2006	1.79296	0.78	56.79	6.27	1	2.52	82	Z	109	14.6	10.42	18.83	53
T433217	3	3	F	2008	2.00545	0.82	58.18	6.7	0	2.52	25	0	109	15	10.58	18.82	54
T435161		1	M	2006	1.63946	0.78	57.3	5.78	1	2.69	89	Z	109	15.1	10.19	18.71	54.5
T435161	2	2	M	2007	1.85154	0.8	58.52	6.24	0	2.28	104	Z	111	12.8	10.06	18.73	58.5
T432503	1	1	M	2006	1.86063	0.8	55.42	6.03	0	2.35	91	Z	110	13.2	10.97	18.86	54.5
T432503		2	M	2007	1.86433	0.81	56.92	6.3	0	2.35	89	Z	112	12.6	11.01	18.6	56
T433204		1	F	2006	1.62118	0.74	55.63	5.94	1	2.17	93	Z	110	12.6	10.53	18.37	54
T433204	2	2	F	2007	1.81421	0.72	56.73	6.4	0	2.82	88	Z	112	14.3	10.24	18.22	56.5
T431906		1	M	2006	1.36175	0.78	54.64	6.05	1	2.39	109	Z	108	12.9	9.77	19.01	52.5
T431906	3	3	M	2008	1.68822	0.79	56.02	6.51	1	2.01	84	Z	108	12.8	9.69	18.73	54.5
T432718		1	F	2006	2.47243	0.88	58.47	8.23	1	2.35	109	Z	112	13.1	11.31	19.03	55.5
T432718	2	2	F	2007	2.49316	0.82	59.82	7.47	1	2.69	86	0	112	13.8	11.43	19.62	54.5
T150537	5	5	M	2006	1.46744	0.71	56.34	5.49	1	2.18	108	0	108	11.6	10.6	18.33	53.5
T431545		2	M	2006	1.82556	0.8	56.15	6.17	1	2.39	108	0	104	11.4	10.12	19.13	52
T431545	5	5	M	2009	2.037	0.8	56.28	6.29	1	2.07	65	0	105	12.7	10.69	19.93	51
T375367		3	M	2006	2.13065	0.85	59.45	6.9	1	2.56	109	0	110	11.3	10.75	18.41	54
T375367	5	5	M	2008	2.49435	0.84	59.82	6.84	1	2.41	62	0	109	12.8	10.47	19.23	54.5
T431818		2	F	2007	1.73499	0.78	58.21	6.16	0	2.35	65	Z	113	16.4	10.79	18.42	58
T431818	3	3	F	2008	1.73117	0.77	58.61	6.45	0	2.26	61	Z	111	17.2	10.82	18.45	55.5
W05876		1	M	2007	1.77046	0.79	57	6.1	0	2.54	65	Z	108	13.1	10.2	17.34	54
W05876	2	2	M	2008	1.80457	0.76	58	6.13	0	2.38	88	Z	108	12	10.33	17.59	57
T150594	6	6	M	2007	2.3753	0.85	55.89	7.03	0	2.49	66	Z	111	15.1	11.16	19.04	57
T297207	5	5	F	2007	2.2938	0.81	59.68	7	1	2.67	87	Z	111	12.9	10.95	17.67	60
T432688		2	M	2007	1.80417	0.76	58.13	6.29	0	2.48	88	Z	112	11.1	9.83	17.71	57
T432688	4	4	M	2009	1.82251	0.77	58.58	6.61	0	2.41	20	0	108	12.3	9.81	18.45	59
W05847		1	M	2007	2.43279	0.93	56.16	6.89	1	2.34	88	Z	106	12.6	10.43	17.15	53.5
W05847	2	2	M	2008	2.25223	0.92	57.65	7.18	1	2.38	84	Z	105	14.3	10.3	17.42	53
T431598		3	M	2007	3.03263	0.85	58.94	7.27	1	2.58	85	0	112	12.8	10.46	18.21	53
T431598	4	4	M	2008	2.87364	0.87	59.01	6.98	1	2.57	83	Z	113	12.5	10.83	18.46	56
T433058		2	M	2007	2.34665	0.83	59.87	7.07	1	2.62	88	0	112	13.2	10.75	18.94	55
T433058	4	4	M	2009	2.33303	0.84	57.51	6.61	1	2.42	69	Z	113	12.7	10.78	18.92	56.5
T433900		2	F	2007	2.22987	0.81	60.4	6.83	1	2.39	90	0	111	13.7	10.71	19.33	54
T433900	3	3	F	2008	1.92553	0.8	60.69	6.98	0	2.13	46	0	109	15.4	10.49	19.58	55
T432687		2	F	2007	2.432	0.8	58.82	6.8	1	2.48	97	Z	112	14.6	10.94	18.94	58.5
T432687	3	3	F	2008	1.85713	0.78	57.81	7.16	0	2.41	51	0	110	14.3	11.16	19.55	52
T302335		5	F	2008	2.94453	0.82	60.18	7.86	0	2.49	21	0	108	14	10.46	19	56.5
T302335	7	7	F	2010	3.11563	0.84	61.35	8.09	1	2.4	94	0	107	14	10.34	19.48	55
W07863		1	M	2008	1.86935	0.79	57.32	6.65	0	2.51	25	0	110	14.7	10.55	18.44	51.5
W07863	2	2	M	2009	2.09665	0.8	59	6.84	1	2.61	49	0	111	14	10.55	18.68	54
T303847	5	5	F	2008	2.93441	0.86	62.09	7.55	1	2.65	26	0	106	15.2	10.82	18.56	57
T218891	6	6	M	2008	2.62915	0.85	58.76	7.03	0	2.74	44	0	106	14.3	10.45	19.9	54
W06397		2	M	2008	2.32069	0.78	57.93	6.51	0	2.54	44	0	112		11.3	17.61	56
W06397	3	3	M	2009	1.90324	0.78	58.99	6.92	0	2.28	94	0	111	12.6	11.01	18.27	55
W07448	1	1	M	2008	2.7531	0.83	60.28	7.28	0	2.68	44	0	109	14.2	10.91	19.98	55
W07448		2	M	2009	2.6958	0.82	60.77	7.67	1	2.65	72	Z	112	14.2	10.62	19.64	58
T433273		3	M	2008	2.51564	0.84	60.24	7.4	0	2.64	44	0	109	15.3	10.47	20.02	55.5
T433273	4	4	M	2009	2.29404	0.82	59.23	6.86	1	2.68	92	Z	109	13.7	10.54	19.52	57.5
T301987	5	5	F	2008	2.45078	0.85	60.78	6.84	0	2.32	61	0	114	15.1	10.57	19.55	54.5
W08440		1	M	2008	1.89455	0.83	57.42	6.7	0	2.13	84	0	112	13.4	10.34	17.99	56
W08440	3	3	M	2010	2.69959	0.87	61.42	7.72	1	2.47	94	0	111	13.8	10.55	18.04	58
W09656		1	M	2008	2.02047	0.81	57.82	6.62	0	2.3	86	0	108	13.2	10.99	18.82	53
W09656	2	2	M	2009	1.95364	0.81	58.01	7.04	0	2.14	69	Z	108	13.6	10.61	18.38	57.5
W07942		1	F	2008	1.8862	0.81	60.61	6.74	1	2.58	86	0	112	13.6	10.17	18.66	56
W07942	3	3	F	2010	1.87803	0.82	59.26	6.47	1	2.39	83	Z	109	13.8	10.17	18.92	55
W08026		1	F	2008	2.21421	0.84	60.17	7.02	1	2.45	87	0	109	12.9	10.51	18.19	55
W08026	3	3	F	2010	2.464	0.84	60.39	7.47	1	2.44	70	Z	106	16	10.63	17.96	57
W09019		1	M	2008	1.53097	0.76	58.41	5.85	1	2.19	88	0	109	14.6	10.72	19.64	53
W09019	3	3	M	2010	1.96779	0.81	59.78	6.56	1	2.33	95	Z	110	14.6	10.98	19.52	59
T446378		2	M	2008	1.70073	0.82	55.27	6.5	1	2.56	83	Z	104	12.8	10.76	17.79	57
T446378	3	3	M	2009	1.86556	0.81	57.22	6.79	1	2.33	90	0	104	13	10.77	18.2	52
W09497		1	M	2008	2.23177	0.83	59.5	7.3	0	2.72	83	Z	113	12.6	10.55	19.03	59
W09497	3	3	M	2010	2.20236	0.79	56.41	6.83	1	2.47	100	Z	111	12.2	10.74	18.74	59
T304981	5	5	M	2008	1.73701	0.84	55.01	6.38	1	2.34	84	Z	105	12.6	10.31	18.44	51
W09395	1	1	F	2008	1.56556	0.78	56.57	5.7	0	2.71	84	Z	108	12.9	10.47	18.22	56
W09395		2	F	2009	1.71714	0.73	58.2	5.91	0	2.76	88	0	107	12.3	10.88	19.11	55
W45559		1	M	2008	1.50719	0.78	54.57	5.94	0	2.4	85	Z	107	0	9.75	18.6	52.5
W45559	2	2	M	2009	1.85976	0.79	55.65	6.21	1	2.52	72	Z	105	13.4	9.71	18.36	53.5
T302994	5	5	M	2008	2.38053	0.82	57.88	6.71	1	2.62	87	Z	109	12.9	10.33	17.18	57.5
T218899	6	6	F	2008	2.21121	0.81	59.5	6.88	1	2.05	87	Z	107	13.3	10.71	18.85	58.5
T434471		3	M	2008	1.70763	0.81	57.62	6.85	1	2.48	87	Z	108	14	10.31	18.7	56
T434471	4	4	M	2009	1.8963	0.79	56.11	6.77	0	2.11	94	0	106	13.4	10.39	18.92	52
W09392		1	M	2008	2.20208	0.84	54.9	6.2	0	2.26	87	Z	107	13.8	10.55	18.33	55
W09392	2	2	M	2009	2.05322	0.85	55.27	6.43	1	2.43	94	Z	106	13.6	10.35	18.42	54
T378111	5	5	M	2009	2.32563	0.8	59.74	7.15	0	2.24	46	0	109	15.3	9.74	19.48	55
W47335	1	1	F	2009	1.8038	0.78	58.87	6.36	1	2.4	70	0	107	14.8	10.89	18.56	55
W47335		2	F	2010	1.77495	0.77	60.09	6.65	0	2.39	86	Z	108	14.6	10.85	17.89	59
W47512		1	M	2009	1.95621	0.79	56.89	6.29	0	2.33	70	0	115	13.7	10.62	20.42	53
W47512	2	2	M	2010	2.26669	0.79	57.61	6.43	0	2.35	70	Z	106	13.1	10.26	17.98	55
W47540		1	M	2009	2.12163	0.79	59.35	7.14	1	2.52	88	0	110	13	10.38	19.29	54
W47540	2	2	M	2010	2.34425	0.79	59.84	7.06	1	2.43	99	Z	111	13	10.46	18.11	59
W48729	1	1	F	2009	1.97508	0.78	57.63	6.64	1	2.49	91	0	109	14	10.53	19.02	53
W48729		2	F	2010	2.51102	0.8	59.19	7.2	1	2.62	101	Z	109	13.6	10.78	18.25	56.5
W49900		1	F	2009	1.4601	0.8	54.46	6.25	1	2.31	87	Z	107	14.2	10.87	18.49	53.5
W49900	2	2	F	2010	1.45924	0.79	54.35	6.45	1	2.12	99	Z	107	13.8	10.69	18.66	54
W47285		1	M	2009	1.89866	0.82	59.45	6.97	0	2.6	90	Z	110	13.1	10.15	17.16	58.5
W47285	2	2	M	2010	2.23247	0.84	60.95	7.33	0	2.41	94	0	109	13.5	10.47	17.97	56.5
W47099	1	1	M	2009	3.21425	0.89	60.96	8.1	1	2.66	90	Z	114	13.6	10.95	18.33	59
W47099		2	M	2010	2.83257	0.89	61.26	8.17	0	2.61	83	Z	112	13.8	10.64	17.61	58.5
W47284		1	M	2009	1.88403	0.83	57.74	6.77	1	2.39	95	0	111	13.5	10.53	18.39	52.5
W47284	2	2	M	2010	1.90409	0.82	58.95	7.14	0	2.54	94	Z	112	13.6	10.2	17.55	58.5
T433596	5	5	M	2010	1.72219	0.82	58.47	6.22	1	2.85	86	0	108	12.7	10.29	19.35	54
T435271	5	5	M	2010	1.9057	0.8	59.79	7.34	1	2.37	96	Z	112	14.5	10.76	18.59	58

## Sheet: variables
Variables	Description
RING	Ring number
age_ind_b	Age of the individual (1-7 years) one year considered when two samples available for the given individuals from two years
age	Age of the individuals when feather sample was taken (age=1: hatched in the previous year)
sex	Sex, M:male, F: female
year_T5	Year when the T5 feather was taken
bending_T5	Bending stiffness of the T5 tail feathers, measured by the slope of the force-displacement line based on ~3900 measurements/feather (Measured by the same person, JD)
width_T5	Dorsoventral width of the shaft of T5 feathers (mm) where the vane part start, measured by digital caliper (measured by the same person, TSz)
length_T5	Length of the shaft measured on scanned image (mm) (Measured by the same person, EM)
mass_T5	Mass of the T5 feather (mg) (measured by the same person, EM)
weird_cat_T5	Weird category of the measured T5 feather, 0: no evidence, 1: indication of weird condition (measured by the same person, TSz)
ALL1B	Mean length of one bar (mm) (measured by the same person, TSz)
day	day of first caugth, when feather was taken, calculated by day since end of March, 1: 1st of April
RINGER	Code of the ringers who measured biometry in the field
wing_length	Length of the left wing (mm)
mass_g	Mass of the bird (g) at caugth
tarsus	Lenght of the tarsus (mm)
keel	Length of the keel (mm)
tailm	Lenght of the tail (mm), mean of left and right tail (T6) feathers measured in the field
