# Supplementary material for: Older birds have better feathers: A longitudinal study on the long-distance migratory Sand Martin, Riparia riparia
Source: PLOS journal article supplement (doi:10.1371/journal.pone.0209737), 2019-01-04
Supplement: S4 (10.1371/journal.pone.0209737.s004) [file journal.pone.0209737.s004]

(a)

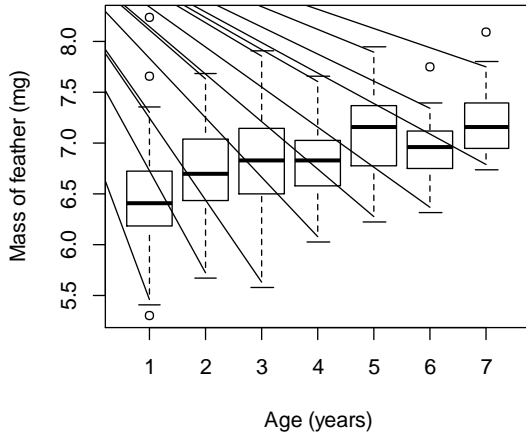

(b)

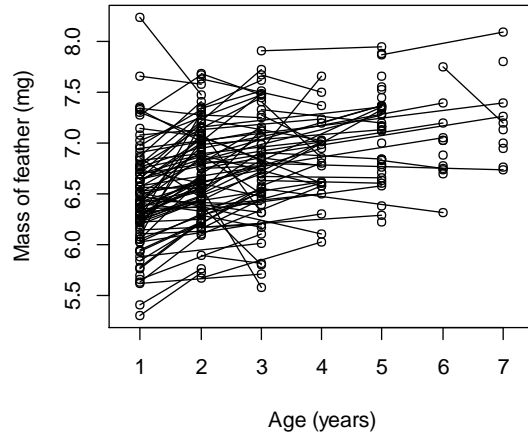

Figure S2. Mass of tail feathers (mg) among Sand Martins belonging to different age categories. (a) For each age category (among-individual age effect:  $P < 0.001$ ), (b) mass of feathers (mg) of the same individual at different ages is connected with lines (within-individual age effect:  $P < 0.001$ ). Box plots show medians, quartiles, 5- and 95-percentiles and extreme values.
