# Supplementary material for: Older birds have better feathers: A longitudinal study on the long-distance migratory Sand Martin, Riparia riparia
Source: PLOS journal article supplement (doi:10.1371/journal.pone.0209737), 2019-01-04
Supplement: S10 (10.1371/journal.pone.0209737.s010) [file journal.pone.0209737.s010]

| Variables    | Description                                                                                                                                                           |
|--------------|-----------------------------------------------------------------------------------------------------------------------------------------------------------------------|
| RING         | Ring number                                                                                                                                                           |
| age_ind_b    | Age of the individual (1-7 years) one year considered when two samples available for the given individuals from two years                                             |
| age          | Age of the individuals when feather sample was taken (age=1: hatched in the previous year)                                                                            |
| sex          | Sex, M: male, F: female                                                                                                                                               |
| year_T5      | Year when the T5 feather was taken                                                                                                                                    |
| bending_T5   | Bending stiffness of the T5 tail feathers, measured by the slope of the force-displacement line based on ~3900 measurements/feather (Measured by the same person, JD) |
| width_T5     | Dorsoventral width of the shaft of T5 feathers (mm) where the vane part start, measured by digital caliper (measured by the same person, TSz)                         |
| length_T5    | Length of the shaft measured on scanned image (mm) (Measured by the same person, EM)                                                                                  |
| mass_T5      | Mass of the T5 feather (mg) (measured by the same person, EM)                                                                                                         |
| weird_cat_T5 | Weird category of the measured T5 feather, 0: no evidence, 1: indication of weird condition (measured by the same person, TSz)                                        |
| ALL1B        | Mean length of one bar (mm) (measured by the same person, TSz)                                                                                                        |
| day          | day of first caught, when feather was taken, calculated by day since end of March, 1: 1st of April                                                                    |
| RINGER       | Code of the ringers who measured biometry in the field                                                                                                                |
| wing_length  | Length of the left wing (mm)                                                                                                                                          |
| mass_g       | Mass of the bird (g) at caught                                                                                                                                        |
| tarsus       | Length of the tarsus (mm)                                                                                                                                             |
| keel         | Length of the keel (mm)                                                                                                                                               |
| tailm        | Length of the tail (mm), mean of left and right tail (T6) feathers measured in the field                                                                              |
